# Supplementary material for: Gadolinium oxide-decorated graphene oxide-based dual-stimuli-responsive smart fluids
Source: Royal Society of Chemistry journal article supplement (doi:10.1039/d4nr04941a), 2025-01-01
Supplement: d4nr04941a1.pdf [file d4nr04941a1.pdf]

## Supplementary Information

# Gadolinium oxide-decorated graphene oxide-based dual-stimuli-responsive smart fluids

Hyukjoon Gwon, Hamin Kim and Seungae Lee\*

*Department of Chemical Engineering, Konkuk University, 120 Neungdong-ro, Gwangjin-gu, Seoul  
05029, Republic of Korea*

---

\* Corresponding author. Tel.: +82-2-2049-6109; E-mail address: [salee@konkuk.ac.kr](mailto:salee@konkuk.ac.kr) (S. Lee).

## Supplementary Information

### 1. High resolution TEM images of GO and Gd<sub>2</sub>O<sub>3</sub>/GO composite.

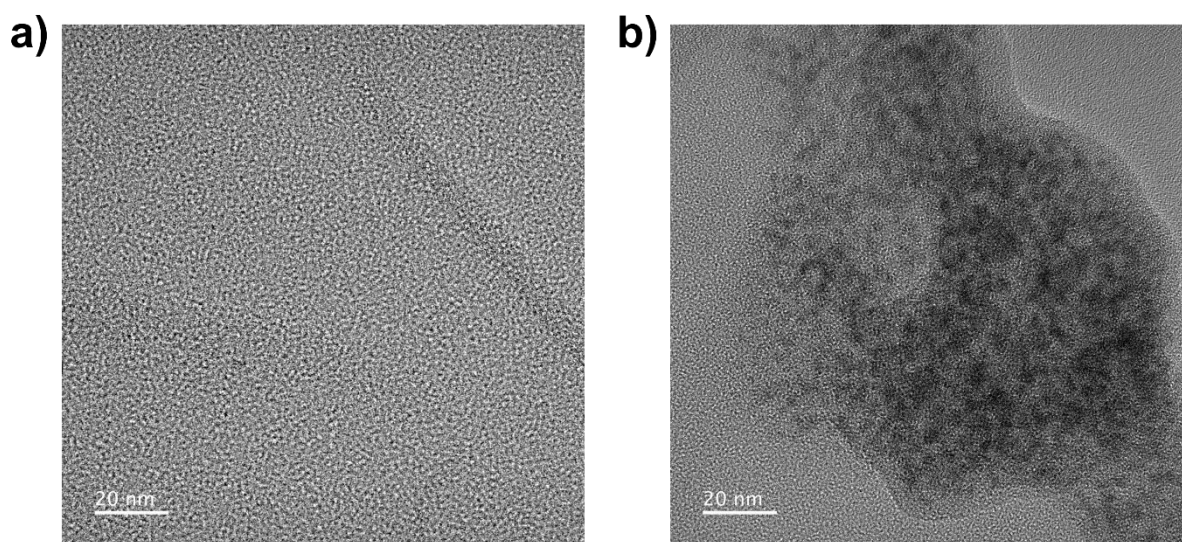

**Fig. S1** High resolution TEM images of a) GO and b) Gd<sub>2</sub>O<sub>3</sub>/GO composite with a Gd<sub>2</sub>O<sub>3</sub>:GO ratio of 1:2.

2. C 1s, O 1s and Gd 4d XPS spectra of Gd<sub>2</sub>O<sub>3</sub>/GO composite with Gd<sub>2</sub>O<sub>3</sub>:GO ratios of 1:2 and 1:3.

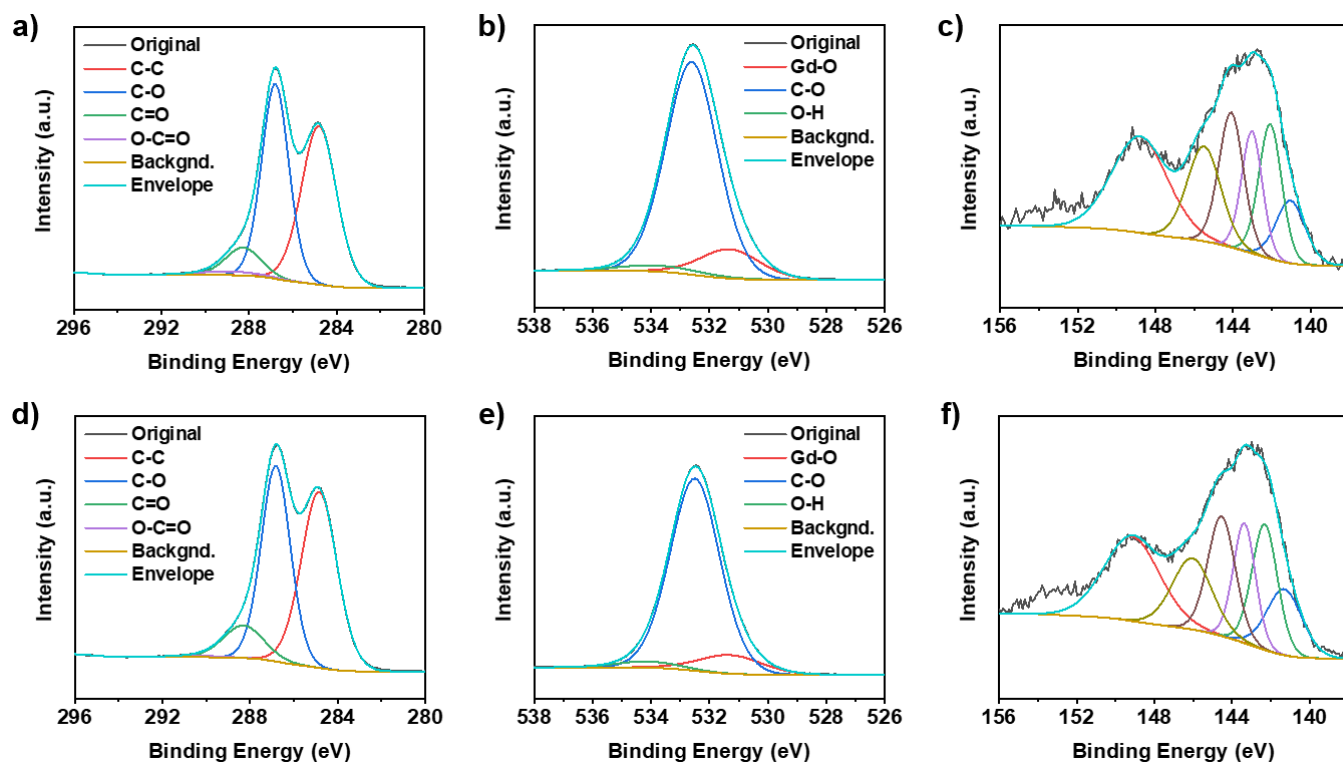

**Fig. S2** a) C 1s, b) O 1s and c) Gd 4d XPS spectra of the Gd<sub>2</sub>O<sub>3</sub>/GO composite with a Gd<sub>2</sub>O<sub>3</sub>:GO ratio of 1:2, and d) C 1s, e) O 1s and f) Gd 4d XPS spectra of the Gd<sub>2</sub>O<sub>3</sub>/GO composite with a Gd<sub>2</sub>O<sub>3</sub>:GO ratio of 1:3.

### 3. FTIR spectra of GO and Gd<sub>2</sub>O<sub>3</sub>/GO composites.

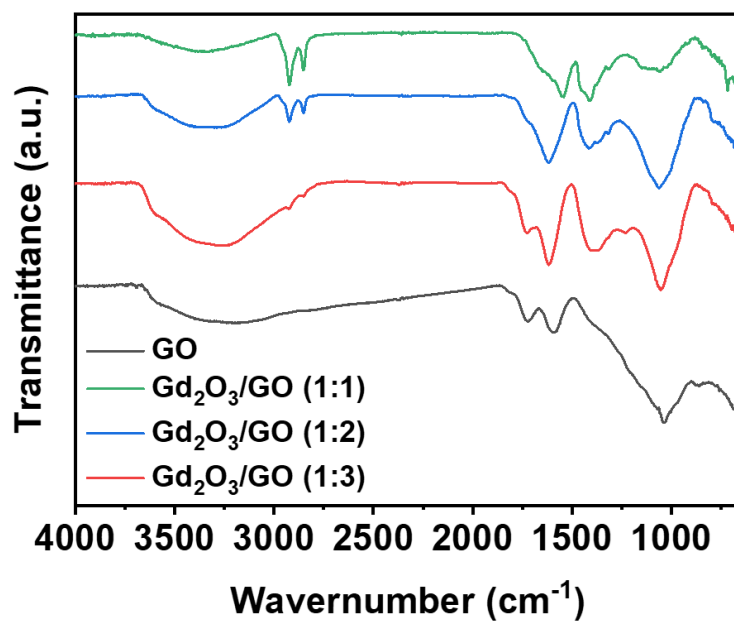

**Fig. S3** FTIR spectra of GO and Gd<sub>2</sub>O<sub>3</sub>/GO composites with Gd<sub>2</sub>O<sub>3</sub>:GO ratios of 1:1, 1:2, and 1:3.

4. Fitting results and parameters for Bingham model and CCJ model of Gd<sub>2</sub>O<sub>3</sub>/GO-based EMR fluids.

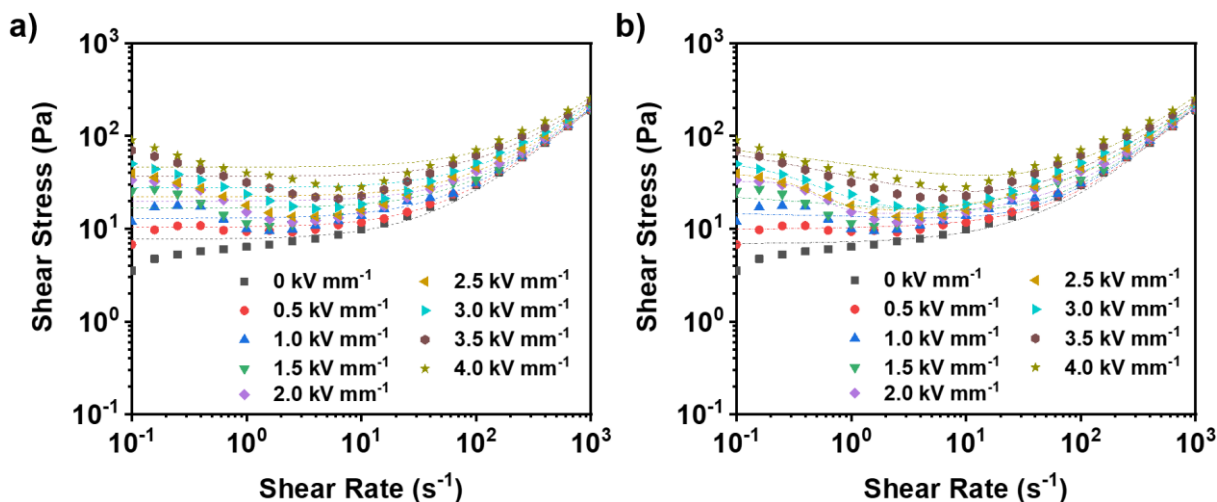

Fig. S4 Electro-responsive properties of the Gd<sub>2</sub>O<sub>3</sub>/GO-based EMR fluids with a Gd<sub>2</sub>O<sub>3</sub>:GO ratio of 1:1 and fitted results for a) Bingham model and b) CCJ model.

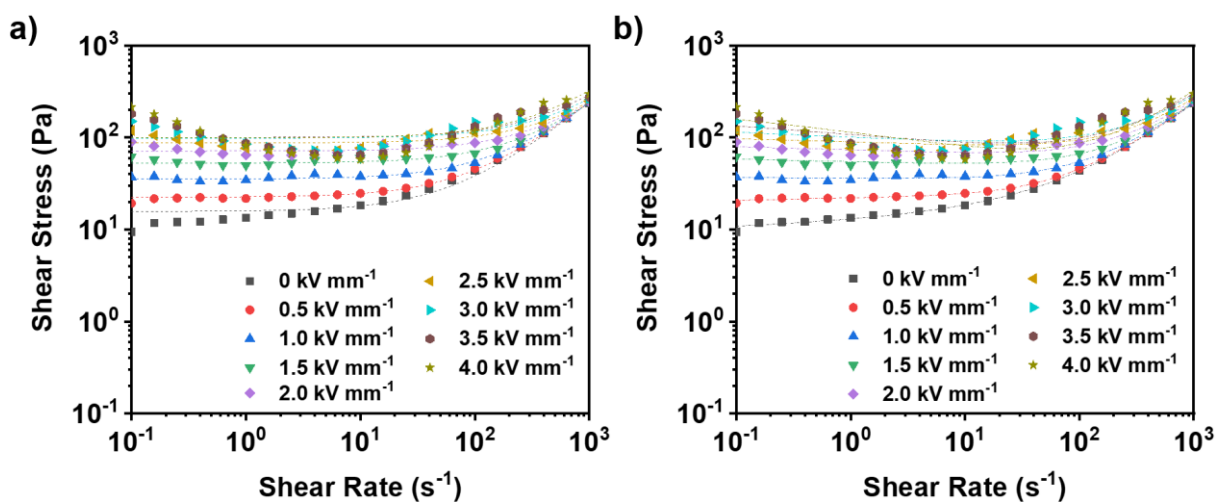

Fig. S5 Electro-responsive properties of the Gd<sub>2</sub>O<sub>3</sub>/GO-based EMR fluids with a Gd<sub>2</sub>O<sub>3</sub>:GO ratio of 1:2 and fitted results for a) Bingham model and b) CCJ model.

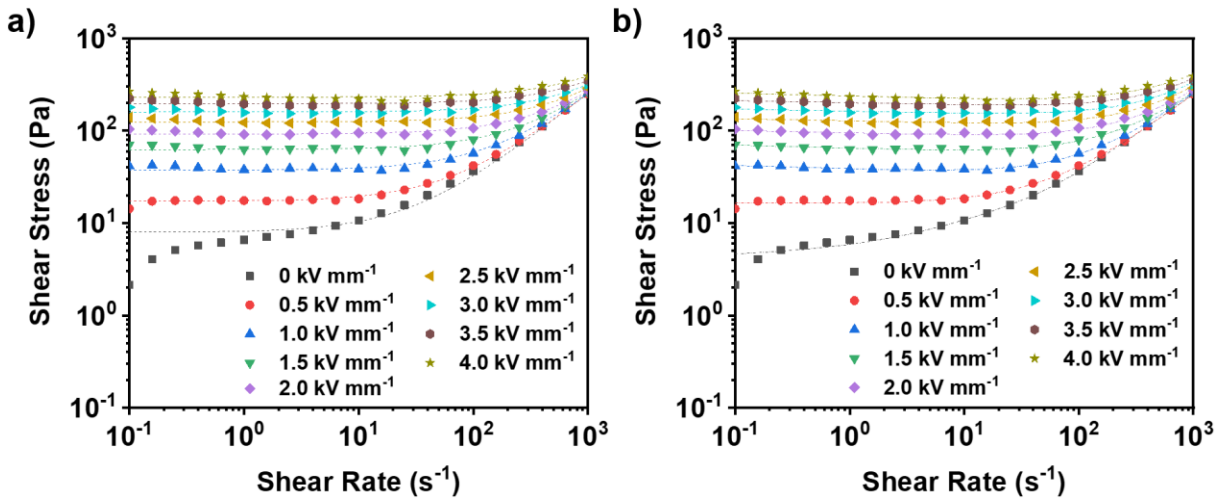

**Fig. S6** Electro-responsive properties of the  $\text{Gd}_2\text{O}_3/\text{GO}$ -based EMR fluids with a  $\text{Gd}_2\text{O}_3:\text{GO}$  ratio of 1:3 and fitted results for a) Bingham model and b) CCJ model.

**Table S1.** The fitting parameters of the Bingham and Cho–Choi–Jhon (CCJ) models for the flow curves of the  $\text{Gd}_2\text{O}_3/\text{GO}$  composite-based EMR fluid with a  $\text{Gd}_2\text{O}_3:\text{GO}$  ratio of 1:1.

| Model   | Parameter <sup>a</sup> | 0kV<br>mm <sup>-1</sup> | 0.5kV<br>mm <sup>-1</sup> | 1.0kV<br>mm <sup>-1</sup> | 1.5kV<br>mm <sup>-1</sup> | 2.0kV<br>mm <sup>-1</sup> | 2.5kV<br>mm <sup>-1</sup> | 3.0kV<br>mm <sup>-1</sup> | 3.5kV<br>mm <sup>-1</sup> | 4.0kV<br>mm <sup>-1</sup> |
|---------|------------------------|-------------------------|---------------------------|---------------------------|---------------------------|---------------------------|---------------------------|---------------------------|---------------------------|---------------------------|
| Bingham | $\tau_y$               | 7.682                   | 10.31                     | 12.90                     | 16.69                     | 19.74                     | 22.11                     | 27.55                     | 36.50                     | 45.98                     |
|         | $\eta_\infty$          | 0.185                   | 0.184                     | 0.186                     | 0.181                     | 0.183                     | 0.193                     | 0.199                     | 0.205                     | 0.217                     |
| CCJ     | $\tau_y$               | 6.143                   | 8.506                     | 13.63                     | 43.43                     | 18.58                     | 27.55                     | 48.66                     | 120.4                     | 138.1                     |
|         | $\eta_\infty$          | 0.188                   | 0.191                     | 0.197                     | 0.195                     | 0.201                     | 0.213                     | 0.222                     | 0.234                     | 0.252                     |
|         | $t_1$                  | 0.005                   | 0.007                     | 0.008                     | 12.75                     | 2.116                     | 2.593                     | 3.076                     | 13.65                     | 8.542                     |
|         | $t_2$                  | 0.187                   | 0.105                     | 0.113                     | 3.523                     | 0.014                     | 0.007                     | 0.040                     | 0.013                     | 0.018                     |
|         | $\alpha$               | 1.862                   | 1.347                     | 0.391                     | 0.165                     | 3.271                     | 2.122                     | 1.230                     | 0.448                     | 0.286                     |
|         | $\beta$                | 0.906                   | 0.926                     | 0.985                     | 1                         | 1                         | 0.935                     | 0.882                     | 0.689                     | 0.525                     |

<sup>a</sup>  $\tau_y$ : yield stress /  $\eta_\infty$ : viscosity at high shear rate /  $t_1, t_2$ : time constant /  $\alpha, \beta$ : exponents for model fitting.

**Table S2.** The fitting parameters of the Bingham and Cho–Choi–Jhon (CCJ) models for the flow curves of the Gd<sub>2</sub>O<sub>3</sub>/GO composite-based EMR fluid with a Gd<sub>2</sub>O<sub>3</sub>:GO ratio of 1:2.

| Model   | Parameter <sup>a</sup> | 0 kV<br>mm <sup>-1</sup> | 0.5 kV<br>mm <sup>-1</sup> | 1.0 kV<br>mm <sup>-1</sup> | 1.5 kV<br>mm <sup>-1</sup> | 2.0 kV<br>mm <sup>-1</sup> | 2.5 kV<br>mm <sup>-1</sup> | 3.0 kV<br>mm <sup>-1</sup> | 3.5 kV<br>mm <sup>-1</sup> | 4.0 kV<br>mm <sup>-1</sup> |
|---------|------------------------|--------------------------|----------------------------|----------------------------|----------------------------|----------------------------|----------------------------|----------------------------|----------------------------|----------------------------|
| Bingham | $\tau_y$               | 15.72                    | 22.44                      | 35.28                      | 52.75                      | 71.19                      | 87.35                      | 98.45                      | 100.2                      | 99.25                      |
|         | $\eta_\infty$          | 0.226                    | 0.220                      | 0.202                      | 0.183                      | 0.166                      | 0.158                      | 0.167                      | 0.193                      | 0.223                      |
| CCJ     | $\tau_y$               | 7.85                     | 18.40                      | 71.80                      | 94.72                      | 121.1                      | 193.3                      | 220.7                      | 265.3                      | 314.4                      |
|         | $\eta_\infty$          | 0.235                    | 0.240                      | 0.239                      | 0.243                      | 0.245                      | 0.248                      | 0.259                      | 0.272                      | 0.294                      |
|         | $t_1$                  | 0.022                    | 0.034                      | 1.828                      | 0.014                      | 0.010                      | 5.362                      | 8.418                      | 10.51                      | 17.33                      |
|         | $t_2$                  | 0.012                    | 0.025                      | 7.382                      | 8.925                      | 9.514                      | 1.901                      | 0.011                      | 0.005                      | 0.019                      |
|         | $\alpha$               | 0.309                    | 0.642                      | 0.026                      | 0.071                      | 0.092                      | 0.068                      | 0.128                      | 0.181                      | 0.251                      |
|         | $\beta$                | 0.768                    | 0.715                      | 0.388                      | 0.987                      | 0.996                      | 1                          | 0.762                      | 0.522                      | 0.315                      |

<sup>a</sup>  $\tau_y$ : yield stress /  $\eta_\infty$ : viscosity at high shear rate /  $t_1, t_2$ : time constant /  $\alpha, \beta$ : exponents for model fitting.

**Table S3.** The fitting parameters of the Bingham and Cho–Choi–Jhon (CCJ) models for the flow curves of the Gd<sub>2</sub>O<sub>3</sub>/GO composite-based EMR fluid with a Gd<sub>2</sub>O<sub>3</sub>:GO ratio of 1:3.

| Model   | Parameter <sup>a</sup> | 0 kV<br>mm <sup>-1</sup> | 0.5 kV<br>mm <sup>-1</sup> | 1.0 kV<br>mm <sup>-1</sup> | 1.5 kV<br>mm <sup>-1</sup> | 2.0 kV<br>mm <sup>-1</sup> | 2.5 kV<br>mm <sup>-1</sup> | 3.0 kV<br>mm <sup>-1</sup> | 3.5 kV<br>mm <sup>-1</sup> | 4.0 kV<br>mm <sup>-1</sup> |
|---------|------------------------|--------------------------|----------------------------|----------------------------|----------------------------|----------------------------|----------------------------|----------------------------|----------------------------|----------------------------|
| Bingham | $\tau_y$               | 7.915                    | 17.18                      | 37.31                      | 62.46                      | 92.16                      | 124.3                      | 159.0                      | 195.9                      | 230.9                      |
|         | $\eta_\infty$          | 0.249                    | 0.234                      | 0.214                      | 0.195                      | 0.175                      | 0.165                      | 0.158                      | 0.154                      | 0.162                      |
| CCJ     | $\tau_y$               | 4.132                    | 31.45                      | 62.94                      | 138.7                      | 170.5                      | 223.0                      | 313.2                      | 383.0                      | 496.0                      |
|         | $\eta_\infty$          | 0.250                    | 0.249                      | 0.254                      | 0.263                      | 0.271                      | 0.291                      | 0.316                      | 0.345                      | 0.387                      |
|         | $t_1$                  | 0.027                    | 0.031                      | 0.005                      | 9.931                      | 0.343                      | 0.017                      | 0.860                      | 8.101                      | 6.017                      |
|         | $t_2$                  | 0.016                    | 3.841                      | 6.511                      | 0.166                      | 0.030                      | 0.335                      | 0.038                      | 0.003                      | 0.001                      |
|         | $\alpha$               | 2.037                    | 0.013                      | 0.099                      | 0.067                      | 0.059                      | 0.060                      | 0.049                      | 0.049                      | 0.072                      |
|         | $\beta$                | 0.496                    | 0.215                      | 0.2153                     | 0.545                      | 1                          | 1                          | 1                          | 1                          | 0.711                      |

<sup>a</sup>  $\tau_y$ : yield stress /  $\eta_\infty$ : viscosity at high shear rate /  $t_1, t_2$ : time constant /  $\alpha, \beta$ : exponents for model fitting.

## 5. Comparative analysis of GO and Fe<sub>3</sub>O<sub>4</sub>-based smart fluids.

**Table S4.** Comparative analysis of ER, MR and EMR fluids composed of GO and Fe<sub>3</sub>O<sub>4</sub>-based materials.

| Stimuli                         | Stimuli-responsive material                                                                        | Filler content             | Maximum applicable field strength/stimuli response (0.1 s <sup>-1</sup> ) <sup>a</sup> | Reference |
|---------------------------------|----------------------------------------------------------------------------------------------------|----------------------------|----------------------------------------------------------------------------------------|-----------|
| Electric field                  | GO                                                                                                 | 5 wt%                      | 5.0 kV mm <sup>-1</sup> / ~280 Pa                                                      | 1         |
|                                 | GO                                                                                                 | 5 wt%                      | 2.5 kV mm <sup>-1</sup> / ~200 Pa                                                      | 2         |
|                                 | Polyhedral oligomeric silsesquioxane-decorated GO                                                  | 3 wt%                      | 3.0 kV mm <sup>-1</sup> / ~400 Pa                                                      | 3         |
|                                 | PS–GO microspheres                                                                                 | 10 vol%                    | 2.0 kV mm <sup>-1</sup> / ~100 Pa                                                      | 4         |
|                                 | GO/Al <sub>2</sub> O <sub>3</sub> composite                                                        | 20 wt%                     | 5.0 kV mm <sup>-1</sup> / ~100 Pa                                                      | 5         |
|                                 | Graphene oxide-coated mesoporous silica spheres                                                    | 3 wt%                      | 3.0 kV mm <sup>-1</sup> / ~35 Pa                                                       | 6         |
| Magnetic field                  | Octahedral-shaped Fe <sub>3</sub> O <sub>4</sub> nanoparticles                                     | 10 vol%                    | 343 kA m <sup>-1</sup> / ~1000 Pa                                                      | 7         |
|                                 | Flower-like Fe <sub>3</sub> O <sub>4</sub> microspheres                                            | 30 wt%                     | 250 kA m <sup>-1</sup> / ~20 Pa                                                        | 8         |
|                                 | Fe <sub>3</sub> O <sub>4</sub> @mSiO <sub>2</sub> nanoparticles                                    | 5 vol%                     | 171 kA m <sup>-1</sup> / ~1000 Pa                                                      | 9         |
|                                 | Core–shell structured PS/Fe <sub>3</sub> O <sub>4</sub> microbead                                  | 11 vol%                    | 343 kA m <sup>-1</sup> / ~80 Pa                                                        | 10        |
|                                 | Carbon layer modified Fe <sub>3</sub> O <sub>4</sub> nanospheres                                   | 10 wt%                     | 350 kA m <sup>-1</sup> / ~10 Pa                                                        | 11        |
|                                 | PMMA/ Fe <sub>3</sub> O <sub>4</sub> composites                                                    | 10 vol%                    | 1999 mA / ~40 Pa                                                                       | 12        |
| Electric field & Magnetic field | Fe <sub>3</sub> O <sub>4</sub> @GO-PS composites                                                   | 5 vol% (ER) / 10 vol% (MR) | E: 3.0 kV mm <sup>-1</sup> / ~25 Pa<br>M: 171 kA m <sup>-1</sup> / ~15 Pa              | 13        |
|                                 | Fe <sub>3</sub> O <sub>4</sub> /GO composites                                                      | 15 wt% (ER) / 20 vol% (MR) | E: 2.5 kV mm <sup>-1</sup> / ~90 Pa<br>M: 257 kA m <sup>-1</sup> / ~650 Pa             | 14        |
|                                 | SiO <sub>2</sub> /TiO <sub>2</sub> @Fe <sub>3</sub> O <sub>4</sub> /SiO <sub>2</sub> nanoparticles | 20 vol%                    | E: 3.0 kV mm <sup>-1</sup> / ~10 Pa<br>M: 796 kA m <sup>-1</sup> / ~350 Pa             | 15        |
|                                 | Gd <sub>2</sub> O <sub>3</sub> /GO composite                                                       | 0.6 wt%                    | E: 4.0 kV mm <sup>-1</sup> / 266 Pa<br>M: 343 kA m <sup>-1</sup> / 1416 Pa             | This work |

<sup>a</sup> E: maximum applied electric field, M: maximum applied magnetic field.



## 6. References.

- 1 J. Hong and J. Jang, *Soft Matter*, 2012, **8**, 7348–7350.
- 2 W. Zhan, Y. Liu, H. Choi and S. Kim, *ACS Appl. Mater. Interfaces*, 2012, **4**, 2267–2272.
- 3 Y. Li, Y. Guan, Y. Liu, J. Yin and X. Zhao, *Nanotechnology*, 2016, **27**, 195702.
- 4 S. Kim, W. Zhang and H. Choi, *J. Mater. Chem. C*, 2014, **2**, 7541–7546.
- 5 W. Zhang, H. Choi and Y. Leong, *Mater. Chem. Phys.*, 2014, **145**, 151–155.
- 6 C. Yoon, S. Lee, S. Hong and J. Jang, *J. Colloid Interface Sci.*, 2015, **438**, 14–21.
- 7 H. Jung and H. Choi, *J. Appl. Phys.*, 2015, **117**, 17E708.
- 8 G. Wang, D. Zhao, N. Li, Y. Zeng, S. Han, Y. Ma, X. Dong and R. Yu, *J. Ind. Eng. Chem.*, 2019, **79**, 17–225.
- 9 W. Han, S. Piao, H. Choi and Y. Seo, *Colloids Surf. A: Physicochem. Eng. Asp.*, 2017, **524**, 79–86.
- 10 F. Fang, J. Kim and H. Choi, *Polymer*, 2009, **50**, 2290–2293.
- 11 L. Bai, L. Pei, S. Cao, X. He, M. Sang, W. Jiang, S. Xuan and X. Gong, *J. Magn. Magn. Mater.*, 2020, **505**, 166734.
- 12 M. Hong, B. Park and H. Choi, *J. Phys. Conf. Ser.*, 2009, **149**, 012055.
- 13 Q. Lu, H. Jin and H. Choi, *J. Mol. Liq.*, 2022, **365**, 120083.
- 14 W. Zhang, Y. Tian, Y. Liu, Z. Song, J. Liu and H. Choi, *RSC Adv.*, 2016, **6**, 77925–77930.
- 15 C. Yoon, Y. Jang, S. Lee and J. Jang, *J. Mater. Chem. C*, 2018, **6**, 10241–10249.
